# Supplementary material for: A microfluidic actuator based on a stimuli-responsive hydrogel grafted into Cucurbita moschata xylems
Source: Royal Society of Chemistry journal article supplement (doi:10.1039/d1sm00162k), 2021-01-01
Supplement: d1sm00162k1.pdf [file d1sm00162k1.pdf]

## SUPPORTING INFORMATION

### Microfluidic actuator based on stimuli-responsive hydrogel grafted into Cucurbita moschata xylems

*Marcelo R. Romero*<sup>1,2\*</sup>; *Gisella Trejo Nieva*<sup>1,2</sup>; *José Vedelago*<sup>3,4,+</sup>; *Cesar G. Gomez*<sup>1,2</sup>

<sup>1</sup>Universidad Nacional de Córdoba, Facultad de Ciencias Químicas,  
Departamento de Química Orgánica, Córdoba, Argentina.

<sup>2</sup>Consejo Nacional de Investigaciones Científicas y Técnicas (CONICET),  
Instituto de Investigación y Desarrollo en Ingeniería de Procesos y Química  
Aplicada (IPQA), Córdoba, Argentina.

<sup>3</sup>Instituto de Física Enrique Gaviola (IFEG), CONICET, Córdoba, Argentina.

<sup>4</sup>Universidad Nacional de Córdoba, Facultad de Matemática, Astronomía,  
Física y Computación (FAMAF), Córdoba, Argentina.

\*Corresponding author: E-mail: [marceloricardoromero@gmail.com](mailto:marceloricardoromero@gmail.com); Phone: +54-0351-  
5353869 annex. 53343. Edificio de Ciencias II. Haya de la Torre y Medina Allende.  
(5000) Córdoba. Argentina.

+Current affiliation: Division of Medical Physics in Radiation Oncology, German Cancer  
Research Center (DKFZ), 69120 Heidelberg, Germany.

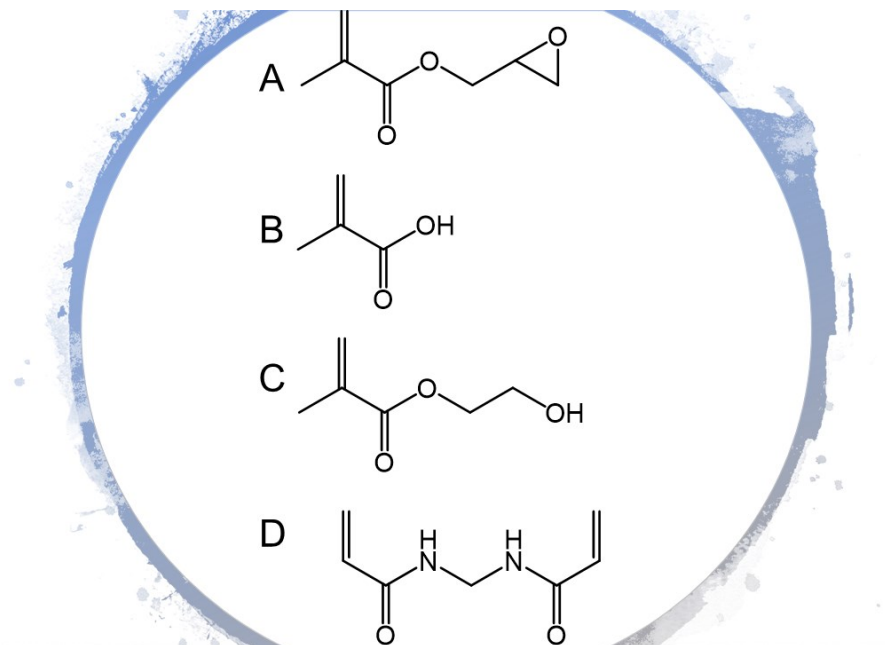

Figure S.1. Molecular structure of a) GMA, b) AA, c) HEMA and d) BIS vinyl compound.

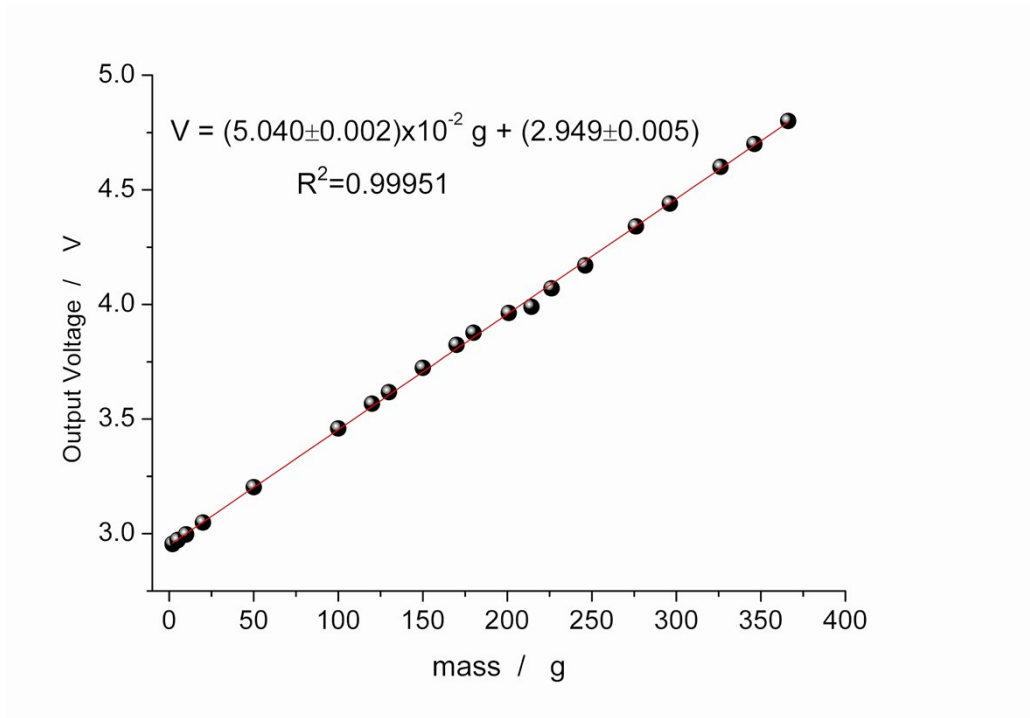

Figure S.2A. Calibration curve of Volts (V) versus mass (g) of electronic amplifier in response to a load cell tested with different calibration mass sets. Inset: adjust function and determination coefficient.

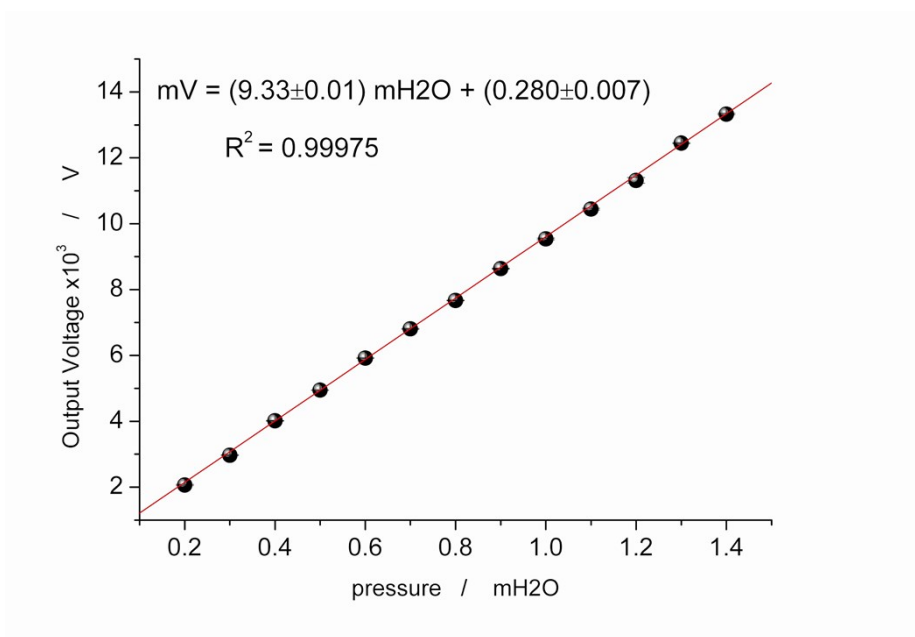

Figure S.2B. Calibration curve of Output Voltage (mV) versus pressure (mH2O) of electronic amplifier in response to pressure sensor tested at different known pressures. Inset: adjust function and determination coefficient.

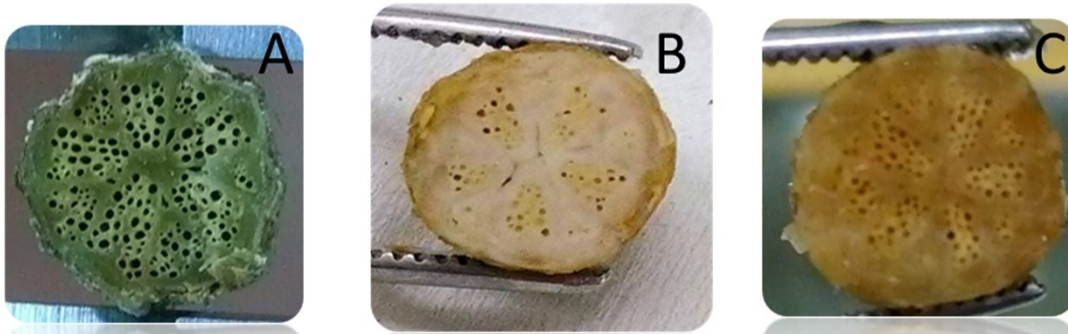

Figure S3. Photographs of cross sections of a pristine vegetal stem (A), after GMA reaction (B) and modification by polymer grafting (C) .

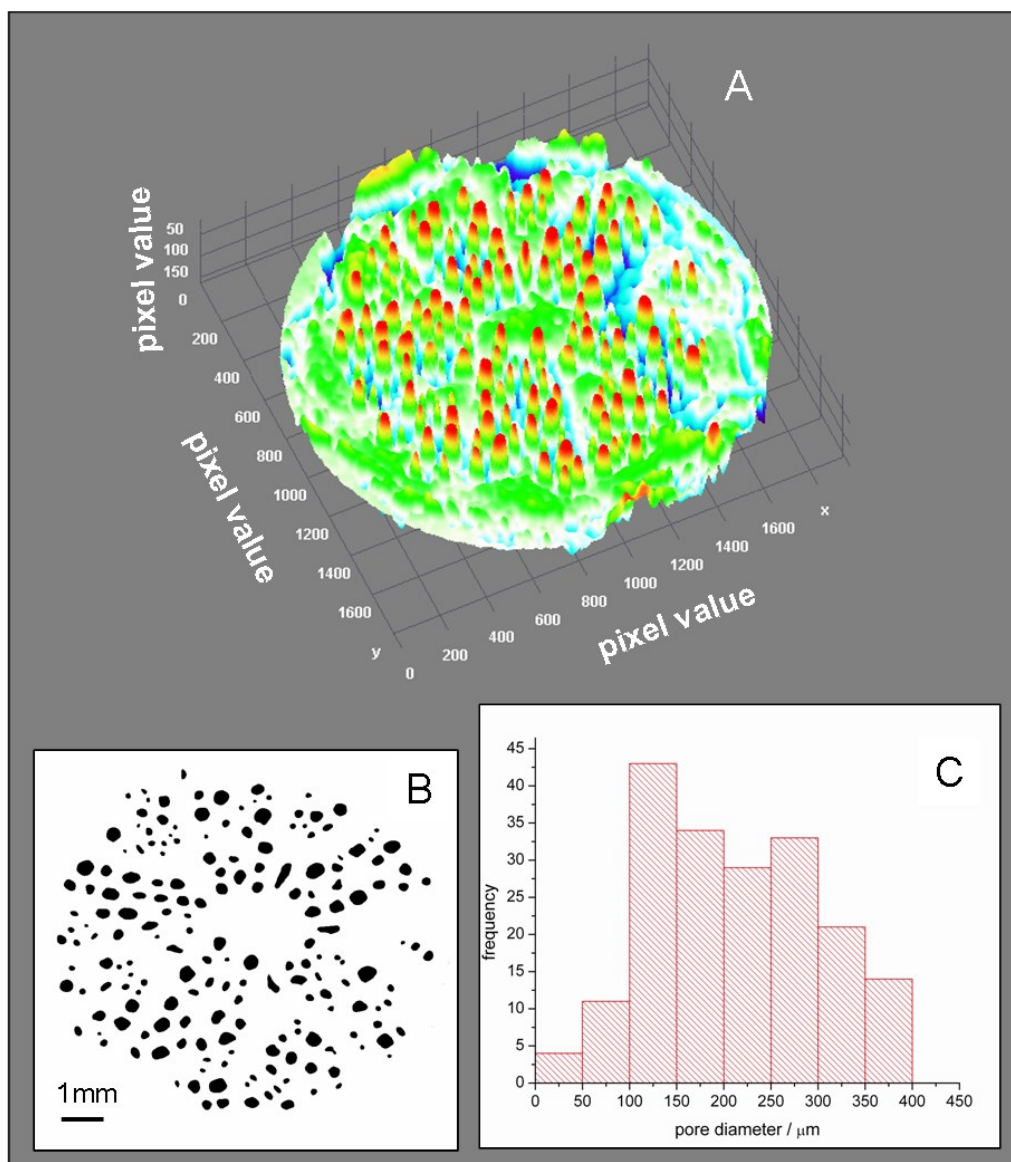

Figure S.4. Pore size and spatial distribution based on image processing. A) Volume viewer of transversal section of a valve without modifications. B) Black dots indicate the distribution and size of capillaries on the cross section of pristine stem. C) Histogram of xylem diameters determined from B.

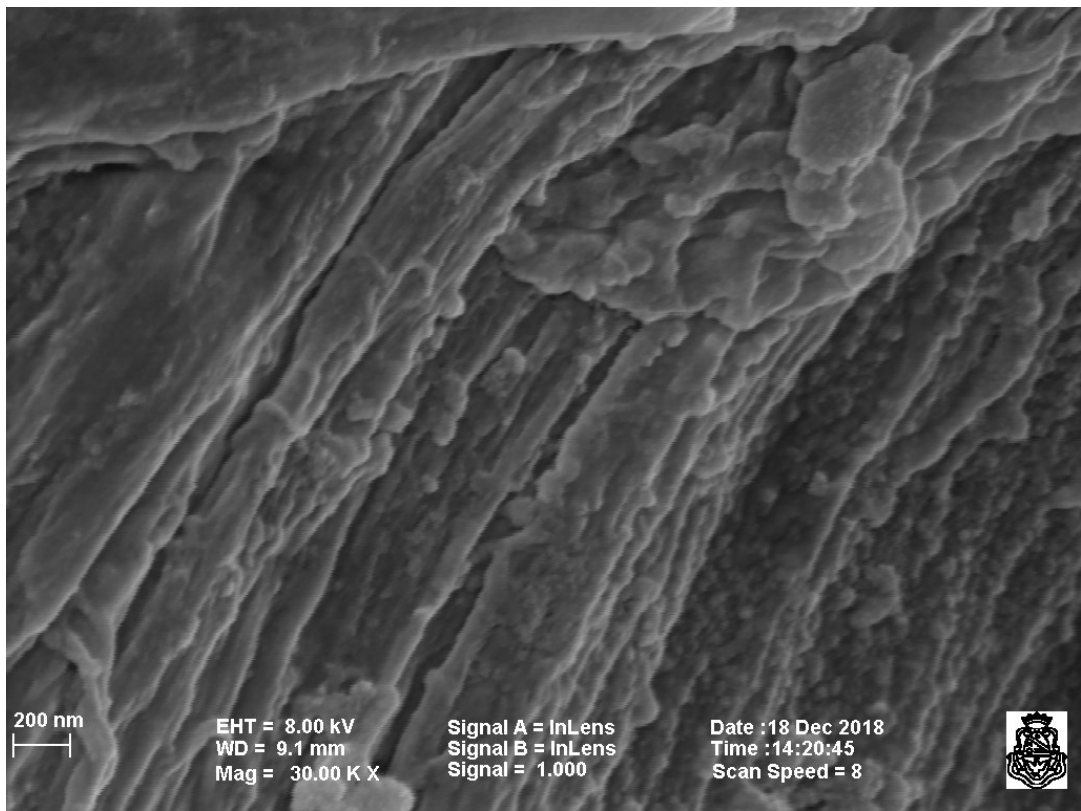

200 nm

EHT = 8.00 kV  
WD = 9.1 mm  
Mag = 30.00 K X

Signal A = InLens  
Signal B = InLens  
Signal = 1.000

Date : 18 Dec 2018  
Time : 14:20:45  
Scan Speed = 8

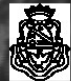

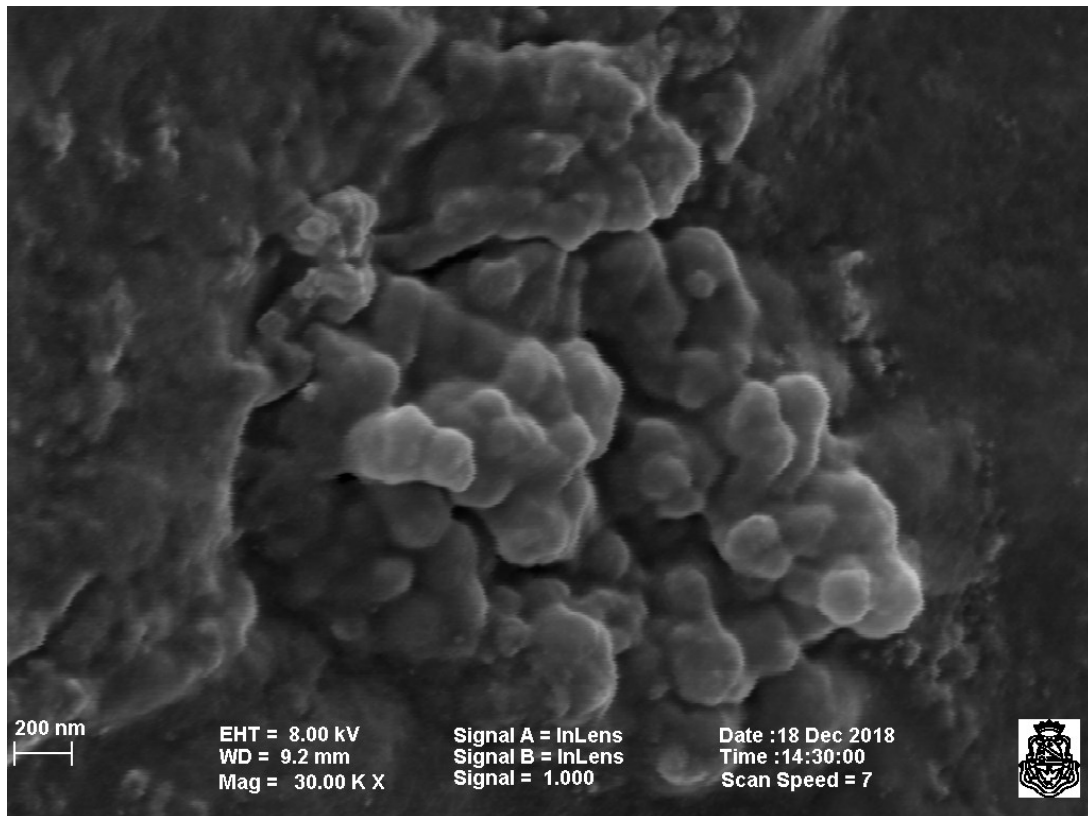

Figure S.5. SEM micrograph of internal xylem wall before (top) and after (bottom) modification with the hydrogel observed at 30kX. Pristine wall shows fibrous aspect and in contrast the grafted hydrogel exhibits a typical globular morphology.

## Equations and uncertainties

### EQUATIONS

Equation 1:

$$q_v = \frac{\pi r^4 \Delta P}{8 \eta L}$$

Equation 2:

$$q_v = q_m \delta^{-1}$$

Equation 3:

$$Q_m = \sum_{i=1}^n q_m(i) \cong \bar{n} \bar{q}_m$$

Equation 4:

$$\bar{d}_c = 2 \sqrt[4]{\frac{\bar{q}_m 8 \eta L}{\delta \pi \Delta P}}$$

## FURTHER EQUATIONS

Average mass flux in each capillary:

$$\bar{q}_m = \frac{Q_m}{\bar{n}}$$

Uncertainty estimation for  $\bar{q}_m \bar{q}_m$  (average mass flux in each capillary):

$$u(\bar{q}_m) = \bar{q}_m \sqrt{\left(\frac{u(Q_m)}{Q_m}\right)^2 + \left(\frac{u(\bar{n})}{\bar{n}}\right)^2}$$

Uncertainty estimation for  $\bar{d}_c \bar{d}_c$  (average diameter of each capillary):

$$u(\bar{d}_c) = \frac{\bar{d}_c}{4} \sqrt{\left(\frac{u(\bar{q}_m)}{\bar{q}_m}\right)^2 + \left(\frac{u(\eta)}{\eta}\right)^2 + \left(\frac{u(L)}{L}\right)^2 + \left(\frac{u(\delta)}{\delta}\right)^2 + \left(\frac{u(\Delta P)}{\Delta P}\right)^2}$$

## UNCERTAINTY ESTIMATION FOR COMPARISON WITH POISEUILLE MODEL



Estimation of the average mass flow in each capillary  $q_m$

|                                     |           |                             |                       |
|-------------------------------------|-----------|-----------------------------|-----------------------|
| Measured mass flow                  | $Q_m$     | 6,467 +/-                   | 0,084 g/s             |
| Average number of capillaries       | $\bar{n}$ | 174 +/-                     | 26                    |
|                                     |           | relative error              | square relative error |
| Measured mass flow                  | $Q_m$     | 0,012989021                 | 0,00017               |
| Average number of capillaries       | $\bar{n}$ | 0,149425287                 | 0,02233               |
| Average mass flux in each capillary | $q_m$     | 0,03717 +/- 0,005574583 g/s |                       |

$$\bar{q}_m = \frac{Q_m}{\bar{n}}$$

$$u(\bar{q}_m) = \bar{q}_m \sqrt{\left(\frac{u(Q_m)}{Q_m}\right)^2 + \left(\frac{u(\bar{n})}{\bar{n}}\right)^2}$$

Estimation of the average diameter of each capillary  $d_c$

|                                     |            |               |                 |               |         |                  |
|-------------------------------------|------------|---------------|-----------------|---------------|---------|------------------|
| Average mass flux in each capillary | $q_m$      | 0,03717 +/-   | 0,005574583 g/s | 3,71667E-05   | 0       | 5,57458E-06 kg/s |
| Dynamic water viscosity             | $\eta$     | 1,0016 +/- *  | mPa.s           | 0,0010016 +/- | #VALUE! | Pa.s             |
| Length of the capillarity           | $L$        | 2,00 +/-      | 0,05 cm         | 0,02000 +/-   | 0,0005  | m                |
| Water density                       | $\delta$   | 0,99823 +/- * | g/cm3           | 998,23 +/-    | #VALUE! | kg/m3            |
| Pressure difference                 | $\Delta P$ | 1,00 +/-      | 0,02 mH2O       | 9806,38 +/-   | 196,13  | Pa               |

\* At 20 °C; uncertainty could be estimated using variations among the temperature variations during the experiments.

|                                     |            |                |                       |
|-------------------------------------|------------|----------------|-----------------------|
|                                     |            | relative error | square relative error |
| Average mass flux in each capillary | $q_m$      | 0,150          | 2,25E-02              |
| Dynamic water viscosity             | $\eta$     | #VALUE!        | 0,00E+00              |
| Length of the capillarity           | $L$        | 0,025          | 6,25E-04              |
| Water density                       | $\delta$   | #VALUE!        | 0,00E+00              |
| Pressure difference                 | $\Delta P$ | 0,020          | 4,00E-04              |
| sum of square relative errors       |            |                | 2,35E-02              |
| Average diameter of each capillary  | $d_c$      | 0,0002359 +/-  | 0,00000905 m          |
| Average diameter of each capillary  | $d_c$      | 236 +/-        | 9 micro_m             |

$$\bar{d}_c = 2 \sqrt{\frac{\bar{q}_m \delta \eta L}{\Delta P}}$$

$$u(\bar{d}_c) = \frac{\bar{d}_c}{4} \sqrt{\left(\frac{u(\bar{q}_m)}{\bar{q}_m}\right)^2 + \left(\frac{u(\eta)}{\eta}\right)^2 + \left(\frac{u(L)}{L}\right)^2 + \left(\frac{u(\delta)}{\delta}\right)^2 + \left(\frac{u(\Delta P)}{\Delta P}\right)^2}$$
